# Supplementary material for: A high affinity and selective DNA aptamer for copper ions
Source: Royal Society of Chemistry journal article supplement (doi:10.1039/d4cc05410e), 2024-01-01
Supplement: d4cc05410e1.xlsx [file d4cc05410e1.xlsx]

## Sheet: Figure 1C
Aptamer	0.5 µM		1 µM
	F/F0	Stdev	F/F0	Stdev
Cu-1	0.73682	0.02158	0.53585	0.04197
Cu-1a	0.9426	0.01047	0.90078	0.03245
Zn\+(2+) Aptamer	0.91042	0.0145	0.84729	0.00574
MNZ-1	0.96165	0.00342	0.9172	0.03217

## Sheet: Figure 2B
Wavelengeth	0 nM	50 nM	100 nM	250 nM	500 nM	750 nM	1000 nM	2000 nM
461.94	113.538	111.467	113.918	97.1056	84.5815	72.495	67.0423	56.6151
462.98	134.519	131.315	131.285	113.752	97.9984	83.7723	76.6634	65.19
464.02	154.782	150.516	148.141	129.853	110.977	94.7209	86.0044	73.5186
465.07	174.325	169.07	164.485	145.409	123.516	105.341	95.0654	81.6011
465.97	193.15	186.976	180.319	160.42	135.617	115.632	103.846	89.4373
467.01	211.255	204.235	195.641	174.886	147.279	125.594	112.347	97.0274
468.05	228.642	220.846	210.453	188.807	158.503	135.228	120.568	104.371
468.95	245.31	236.811	224.753	202.182	169.288	144.533	128.508	111.469
470	261.259	252.128	238.543	215.013	179.634	153.509	136.169	118.321
471.04	276.488	266.797	251.821	227.298	189.541	162.156	143.549	124.926
471.94	290.999	280.82	264.588	239.039	199.01	170.475	150.65	131.285
472.98	304.791	294.195	276.844	250.234	208.04	178.465	157.47	137.398
474.02	317.864	306.922	288.589	260.884	216.632	186.126	164.01	143.265
475.07	331.357	320.436	301.298	272.079	225.362	194.535	171.115	149.604
475.97	343.884	333.1	313.204	282.918	233.861	202.177	178.131	155.439
477.01	355.753	345.129	324.408	292.976	242.136	209.356	184.261	161.28
478.05	367.001	356.677	334.949	302.331	250.059	215.884	189.533	166.461
478.95	377.404	366.731	344.484	310.29	257.337	221.644	194.433	170.962
480	385.9	374.711	353.202	317.66	263.531	226.663	199.027	175.11
481.06	392.755	381.488	360.284	324.108	268.231	231.492	203.121	179.036
481.96	398.326	387.71	365.923	329.292	271.783	235.637	206.298	182.273
483.03	403.389	392.962	370.239	333.175	274.842	239.429	209.285	184.71
483.93	407.306	396.349	373.905	335.96	277.498	242.429	211.535	186.785
485	409.788	398.635	376.434	337.987	279.383	244.721	213.357	188.262
486.06	411.441	399.979	377.748	338.844	280.517	245.82	213.875	189.17
486.96	412.177	400.733	377.462	338.908	281.376	246.351	213.63	189.621
488.03	411.713	400.184	376.684	338.111	281.748	246.267	213	189.797
488.93	410.447	398.183	375.394	336.548	281.84	245.793	212.638	189.482
490	409.343	395.391	374.026	334.244	281.007	244.364	211.422	188.547
491.04	407.856	392.177	371.674	331.521	279.451	242.304	209.585	186.912
491.94	404.548	388.589	368.487	328.967	276.994	239.765	207.407	184.938
492.98	400.416	384.958	364.102	325.693	274.683	237.104	205.222	182.958
494.02	396.384	381.377	358.971	321.819	272.409	234.324	202.849	180.74
495.07	392.015	377.653	353.971	317.754	269.478	231.265	200.41	178.153
495.97	386.533	372.659	348.721	313.471	265.762	227.703	197.743	175.402
497.01	380.127	366.827	343.507	308.229	261.636	224.558	194.56	172.857
498.05	373.81	360.559	337.927	302.835	257.371	221.713	191.53	170.054
498.95	367.728	355.069	332.576	297.894	253.222	218.761	188.437	167.084
500	362.246	349.686	327.514	293.151	249.314	215.091	185.545	164.046
501.02	357.364	344.272	322.944	287.966	245.773	211.43	181.907	161.027
502.05	352.148	338.339	318.577	283.248	242.156	207.465	178.134	157.565
502.94	346.281	332.16	313.558	278.903	238.077	203.557	174.585	154.168
503.97	339.487	325.998	308.208	274.823	233.501	199.853	171.243	151.291
505	332.967	320.486	302.403	270.391	229.004	196.184	167.834	148.779
506.02	326.8	314.907	296.989	266.339	225.246	192.372	164.631	146.017
507.05	320.961	309.547	291.925	262.007	221.517	188.902	161.786	143.623
507.94	315.173	304.222	286.913	257.708	217.866	185.458	159.038	141.32
508.97	309.436	298.932	281.95	253.442	214.294	182.04	156.387	139.109
510	303.751	293.675	277.039	249.21	210.801	178.648	153.832	136.99
511.04	298.118	288.454	272.178	245.011	207.387	175.282	151.375	134.962
511.94	292.535	283.267	267.367	240.846	204.051	171.941	149.015	133.026
512.98	287.005	278.114	262.608	236.713	200.794	168.627	146.751	131.181
514.02	281.525	272.997	257.898	232.614	197.616	165.339	144.585	129.428
515.07	276.097	267.913	253.24	228.549	194.517	162.076	142.515	127.767
515.97	270.721	262.864	248.632	224.517	191.497	158.839	140.542	126.197
517.01	265.396	257.85	244.074	220.518	188.555	155.629	138.667	124.719
518.05	260.122	252.87	239.567	216.552	185.692	152.444	136.888	123.332

## Sheet: Figure 2C
Concentration of Cu2+ (nM)	Cu-1		Cu-1a		Zn2+ aptamer
	F/F0	Stdev	F/F0	Stdev	F/F0	Stdev
50	0.979879	0.0109679	0.950174	0.00457503	0.948332	0.0481162
100	0.911014	0.0193311	0.923225	0.0112182	0.913669	0.0423159
250	0.828534	0.0171794	0.898799	0.00125553	0.904867	0.00295887
500	0.709222	0.0111323	0.849278	0.0292452	0.885978	0.0209743
750	0.605824	0.00639791	0.797144	0.0151077	0.864801	0.00157815
1000	0.5369	0.0226532	0.774003	0.00696471	0.84906	0.0023047
2000	0.463804	0.00186167	0.701506	0.00223628	0.718549	0.0292878

## Sheet: Figure 3B
	0 nM	10 nM	25 nM	50 nM	75 nM	100 nM	250 nM	500 nM
Time (min)	F (a.u)	F (a.u)	F (a.u)	F (a.u)	F (a.u)	F (a.u)	F (a.u)	F (a.u)
0	1828	1825	1848	1763	1822	1800	1814	1824
0.5	1851	1849	1866	1791	1842	1809	1849	1842
1	1860	1851	1880	1786	1847	1831	1844	1869
1.5	1870	1866	1892	1804	1863	1841	1866	1882
2	1893	1882	1899	1827	1877	1851	1872	1898
2.5	1900	1898	1918	1835	1896	1871	1891	1919
3	1914	1910	1928	1849	1896	1877	1909	1932
3.5	1931	1922	1944	1868	1913	1896	1915	1959
4	1942	1931	1955	1870	1925	1910	1936	1972
4.5	1955	1940	1960	1893	1935	1917	1956	1994
5	1968	1957	1971	1908	1945	1933	1961	2007
5.5	2064	2016	2232	2205	2587	2733	4263	6039
6	2057	2014	2272	2263	2713	2965	4981	6839
6.5	2056	2040	2294	2336	2856	3190	5476	7166
7	2061	2035	2317	2392	2973	3367	5808	7228
7.5	2070	2045	2345	2456	3102	3549	6070	7304
8	2068	2066	2374	2509	3203	3708	6224	7316
8.5	2078	2072	2404	2573	3310	3861	6332	7325
9	2085	2081	2433	2618	3417	4001	6434	7330
9.5	2092	2097	2462	2685	3515	4129	6508	7319
10	2097	2110	2506	2737	3598	4256	6584	7314
10.5	2106	2116	2521	2779	3670	4375	6602	7332
11	2102	2120	2556	2839	3776	4457	6624	7309
11.5	2115	2131	2572	2892	3839	4555	6633	7306
12	2123	2142	2598	2934	3918	4646	6660	7312
12.5	2127	2157	2626	2981	3964	4718	6633	7295
13	2128	2157	2640	3023	4030	4809	6625	7290
13.5	2137	2167	2665	3065	4100	4878	6640	7298
14	2133	2165	2674	3109	4161	4917	6622	7281
14.5	2150	2165	2701	3140	4219	5020	6617	7284
15	2139	2186	2716	3168	4267	5078	6644	7287

## Sheet: Fugure 3C
Concentration of Cu2+ (nM)	(F-F0)/F0	Stdev
0	0.079513	0.010433
10	0.129536	0.0177424
25	0.398772	0.0296723
50	0.759439	0.140094
75	1.20739	0.0183908
100	1.55149	0.106793
250	2.32378	0.0916169
500	2.55504	0.106827

## Sheet: Fugure 3D
	(F-F0)/F0	Stdev
H20	0.06186	0.00508
Ca2+	-0.01245	0.0336
Sc3+	-0.6665	0.05055
Cr3+	-0.02737	0.06227
Mn2+	0.1194	0.07257
Fe2+	-0.05028	0.01752
Fe3+	-0.77999	0.06847
Co2+	0.15368	0.01131
Ni2+	0.02191	0.06441
Cu2+	2.63058	0.10683
Cu2+ + AA	0.39022	0.06145
Zn2+	0.05402	0.02386
Cd2+	-0.05329	0.04587
Ba2+	-0.07248	0.1101
Tb3+	0.07031	0.00709
Hg2+	0.16081	0.05558
Pb2+	-0.0622	0.0567

## Sheet: Figure S2A， B
Cu-1a										Zn2+ aptamer
Wavelengeth	0 nM	50 nM	100 nM	250 nM	500 nM	750 nM	1000 nM	2000 nM		Wavelengeth	0 nM	50 nM	100 nM	250 nM	500 nM	750 nM	1000 nM	2000 nM
461.94	167.387	169.595	162.034	155.325	152.875	138.736	131.277	125.641		461.94	124.335	114.68	111.36	116.058	112.503	110.003	105.465	90.7349
462.98	186.498	188.448	180.8	174.633	170.719	152.545	146.043	140.247		462.98	134.594	125.532	120.751	124.219	122.506	119.848	113.78	98.4849
464.02	208.445	206.398	197.113	194.624	186.899	167.19	162.979	153.929		464.02	146.589	136.817	131.916	134.294	130.926	131.245	127.125	106.924
465.07	233.435	228.236	218.661	208.633	209.564	182.995	179.209	163.225		465.07	162.755	147.699	143.005	144.312	140.302	140.486	136.918	113.418
465.97	252.266	246.035	240.302	224.221	229.904	200.94	201.204	170.438		465.97	175.984	161.211	152.42	155.69	150.657	149.436	150.597	123.019
467.01	284.65	268.78	260.006	249.793	244.029	223.366	215.147	193.487		467.01	188.375	172.731	164.443	167.912	160.128	159.174	159.135	130.447
468.05	309.444	300.403	281.919	276.811	262.222	241.633	231.325	213.454		468.05	199.916	180.405	174.985	180.04	169.869	172.76	167.204	136.357
468.95	330.923	327.436	304.97	300.978	277.252	260.185	249.339	230.336		468.95	212.419	190.379	184.688	188.293	180.521	179.756	173.484	142.344
470	343.919	352.048	333.358	314.513	309.885	287.255	269.576	241.65		470	224.966	202.96	198.261	197.62	192.098	188.6	184.069	152.929
471.04	377.399	365.729	351.407	342.058	326.573	308.838	286.57	256.361		471.04	234.219	215.643	209.994	209.293	201.462	198.532	195.791	163.765
471.94	406.706	382.599	367.658	360.986	349.885	323.308	304.609	271.738		471.94	243.393	226.951	217.433	218.388	212.302	212.489	205.27	172.315
472.98	433.809	400.323	382.702	385.566	359.06	339.328	325.596	292.209		472.98	253.993	237.008	222.879	225.446	220.831	218.371	214.428	178.426
474.02	452.958	421.221	408.998	399.674	382.469	359.696	344.295	310.357		474.02	266.104	243.292	235.506	234.921	227.316	227.709	221.121	183.924
475.07	466.324	442.454	430.399	426.113	403.215	375.285	361.362	320.892		475.07	274.962	250.556	244.757	245.989	233.336	236.535	231.807	190.067
475.97	481.067	462.305	451.849	442.206	423.812	390.365	371.718	335.378		475.97	280.667	256.872	251.637	253.376	242.848	244.286	236.692	196.271
477.01	503.298	486.578	464.753	462.526	439.352	408.672	382.929	350.382		477.01	286.919	264.127	256.163	259.81	249.488	248.036	244.935	201.355
478.05	520.088	500.058	474.363	468.458	451.863	419.873	395.669	362.582		478.05	293.886	272.151	264.126	265.993	252.98	254.601	250.452	206.885
478.95	525.107	513.4	481.789	482.177	455.275	425.752	408.84	367.584		478.95	301.893	280.92	269.872	271.026	261.121	258.731	256.505	210.632
480	537.851	523.899	499.613	492.957	460.423	430.387	418.088	380.117		480	304.161	284.828	276.022	275.074	268.17	262.477	259.511	214.512
481.06	559.221	539.037	517.783	507.265	479.545	437.922	427.417	393.855		481.06	307.472	284.593	279.732	277.331	270.998	264.724	263.604	216.605
481.96	572.08	551.647	529.388	507.657	496.528	453.161	430.911	399.362		481.96	308.847	285.634	282.889	280.725	272.887	269.982	264.278	218.889
483.03	578.828	549.607	534.755	515.95	493.816	461.007	434.292	395.419		483.03	312.505	289.916	282.769	282.16	274.877	277.207	262.189	220.163
483.93	577.552	554.597	541.443	521.09	490.666	462.912	434.274	396.93		483.93	315.502	292.426	284.193	282.975	277.744	277.701	263.181	220.553
485	581.999	562.388	542.148	524.611	499.267	456.862	439.866	402.051		485	316.41	292.225	285.701	284.763	276.561	276.674	265.232	220.42
486.06	582.596	568.111	536.795	527.754	505.343	459.396	439.02	406.919		486.06	316.693	291.124	284.035	286.64	276.298	275.426	267.293	219.322
486.96	590.715	569.449	538.952	534.759	510.91	464.06	447.391	403.344		486.96	313.685	292.049	280.915	285.552	275.417	275.39	266.977	221.526
488.03	597.235	570.086	547.678	533.09	505.33	462.65	450.748	402.986		488.03	311.787	290.404	274.143	284.696	277.504	270.226	263.748	220.403
488.93	595.636	562.672	544.579	527.226	505.793	455.67	448.393	407.924		488.93	313.327	287.823	275.79	281.268	277.259	268.669	264.89	220.334
490	574.444	547.587	529.893	519.92	504.073	452.241	439.884	405.681		490	311.579	286.223	275.092	278.887	272.541	269.1	266.015	216.492
491.04	560.091	557.866	521.301	511.657	508.255	456.414	439.643	400.611		491.04	308.426	286.628	274.892	274.588	270.513	269.96	261.879	216.809
491.94	567.627	553.873	521.094	505.785	494.699	451.944	438.642	390.944		491.94	302.311	285.569	272.633	274.868	265.746	267.75	253.089	213.689
492.98	572.355	545.079	515.146	509.443	487.225	444.743	428.209	386.861		492.98	304.387	280.67	269.597	271.73	262.634	262.519	249.626	211.234
494.02	568.007	533.616	512.058	507.349	479.064	434.159	423.616	387.994		494.02	299.033	275.255	266.266	268.836	258.519	256.5	248.84	206.77
495.07	553.781	536.955	511.607	492.946	481.284	438.265	419.937	382.186		495.07	297.037	270.007	263.887	263.644	255.282	253.759	247.402	203.382
495.97	545.416	525.136	511.928	481.009	475.258	433.634	422.66	370.263		495.97	292.744	266.98	262.238	259.256	250.991	251.092	243.885	200.313
497.01	541.38	515.501	508.268	482.1	467.644	431.404	413.174	359.118		497.01	290.514	264.226	256.8	255.848	245.873	247.298	242.34	196.564
498.05	538.085	511.928	496.873	483.5	455.326	420.4	405.964	369.484		498.05	282.641	258.944	254.06	253.307	243.002	241.648	238.271	193.979
498.95	532.81	502.979	476.128	478.571	445.504	414.681	406.014	375.303		498.95	279.155	254.373	250.198	246.897	240.609	239.722	233.719	192.07
500	520.109	499.244	466.1	465.501	432.735	406.869	405.474	367.214		500	272.896	253.561	244.388	242.244	237.832	237.303	231.749	192.103
501.02	517.2	491.064	466.214	453.72	420.449	403.897	386.772	347.139		501.02	269.419	251.371	239.173	236.65	232.112	234.365	228.935	188.952
502.05	505.847	485.75	458.181	442.222	424.608	403.202	369.775	338.083		502.05	261.937	245.827	236.443	236.822	227.383	229.869	221.311	184.345
502.94	494.023	474.26	448.175	436.057	428.23	392.752	366.044	340.712		502.94	258.751	236.048	233.277	234.067	226.175	226.256	213.479	181.344
503.97	486.211	462.568	436.804	430.04	421.832	378.903	366.314	339.679		503.97	257.444	231.96	228.899	230.711	222.481	218.903	210.787	176.423
505	479.983	449.62	436.582	427.544	401.19	370.122	360.168	324.919		505	254.448	230.035	221.914	221.784	216.405	212.565	209.133	174.447
506.02	467.649	443.156	430.899	422.39	394.919	371.409	351.866	319.012		506.02	247.125	227.302	217.22	216.42	209.893	211.604	206.403	171.573
507.05	450	433.296	424.277	412.838	387.432	368.677	342.067	314.491		507.05	241.206	221.898	215.596	216.37	209.511	210.178	203.464	170.218
507.94	443.169	423.303	407.685	402.006	375.334	359.194	338.054	314.074		507.94	241.072	216.853	211.824	215.874	207.636	205.223	199.99	164.68
508.97	438.209	413.775	400.533	395.106	368.045	353.43	335.037	304.796		508.97	235.116	214.303	206.636	209.328	205.673	199.618	196.95	163.065
510	432.73	411.17	397.125	389.771	365.61	348.676	330.293	300.107		510	227.518	210.207	201.954	203.915	199.584	197.23	196.403	160.681
511.04	423.278	409.135	390.078	379.386	363.302	342.209	324.679	294.941		511.04	223.203	208.462	200.727	201.057	198.043	194.072	192.546	157.65
511.94	409.815	402.87	380.301	373.345	359.489	330.532	324.637	291.52		511.94	220.882	204.826	198.552	196.151	196.513	192.995	187.084	155.109
512.98	405.319	388.445	374.104	368.068	356.666	324.546	316.194	277.573		512.98	217.53	199.312	195.913	192.114	193.192	190.288	181.677	152.37
514.02	395.877	377.906	365.137	364.715	348.683	322.195	301.997	271.019		514.02	212.136	194.513	190.862	191.4	187.838	183.722	177.007	150.538
515.07	391.203	381.637	358.422	354.434	342.989	318.329	292.052	272.616		515.07	208.265	193.096	186.798	188.548	182.942	181.352	173.085	148.934
515.97	382.433	373.18	344.057	347.055	340.672	307.426	294.837	272.073		515.97	202.4	190.735	182	181.1	179.531	177.789	172.091	147.765
517.01	378.121	355.678	342.341	338.193	325.366	299.639	294.167	262.84		517.01	200.703	186.085	177.456	179.022	175.617	175.866	172.643	144.23
518.05	373.816	339.481	338.327	330.797	313.801	295.11	281.274	256.599		518.05	198.123	181.578	174.677	176.178	171.335	169.611	166.188	140.857

## Sheet: Figure S3A， B
Time (min)	Buffer 1	Buffer 2	Buffer 3	Buffer 4				(F-F0)/F0	Stdev
	F (a.u)	F (a.u)	F (a.u)	F (a.u)			Buffer 1	-0.26343	0.00542
0	4260	2166	2090	1758			Buffer 2	1.07554	0.10861
0.5	4258	2175	2107	1773			Buffer 3	1.92974	0.03662
1	4260	2180	2128	1759			Buffer 4	2.64137	0.20902
1.5	4270	2193	2158	1765
2	4287	2167	2175	1786
2.5	4309	2190	2194	1792
3	4296	2217	2218	1803
3.5	4308	2227	2253	1823
4	4346	2256	2284	1839
4.5	4353	2272	2310	1846
5	4374	2291	2344	1864
5.5	3172	4825	5843	5288
6	3197	4891	6495	6178
6.5	3191	4878	6728	6568
7	3197	4870	6836	6809
7.5	3198	4867	6986	6891
8	3196	4863	6996	6941
8.5	3209	4885	7031	6984
9	3204	4885	7021	6989
9.5	3208	4876	6972	7009
10	3216	4883	6995	7041
10.5	3207	4870	6961	7032
11	3211	4851	6939	7048
11.5	3213	4870	6942	7060
12	3218	4873	6954	7081
12.5	3188	4879	6964	7056
13	3217	4887	6950	7098
13.5	3219	4905	6935	7095
14	3206	4922	6944	7074
14.5	3211	4917	6921	7061
15	3205	4931	6928	7063

## Sheet: Figure S4
	0 nM		100 nM
	F (a.u)	Stdev	F (a.u)	Stdev		(F-F0)/F0	Stdev
pH 6	1899	24.0416	5039	55.1543		1.55149	0.106793
pH 7	4397	29.6985	7919	113.137		0.801129	0.0378958
pH 8	6165.5	140.714	7820.5	64.3467		0.26864	0.0185174

## Sheet: Figure S5
Concentration of Quencher-cDNA (nM)	F (a.u)	Stdev
0	2128.5	23.3345
0.5	2084	2.82843
1	1800.5	67.1751
1.5	1721.5	21.9203
2	1409.5	7.77817
3	1061	84.8528
4	882.5	17.6777
6	690.5	31.8198
8	662.5	20.5061
10	613.5	67.1751
12	535.5	23.3345
16	485.5	24.7487

[truncated: 2 more sheets: Figure S6, Figure S7]
