# Supplementary material for: A high affinity and selective DNA aptamer for copper ions
Source: Royal Society of Chemistry journal article supplement (doi:10.1039/d4cc05410e), 2024-01-01
Supplement: d4cc05410e2.pdf [file d4cc05410e2.pdf]

## **Electronic supplementary information**

### **A high affinity and selective DNA aptamer for copper ions**

Jin Wang<sup>1,2</sup>, Yibo Liu<sup>2</sup>, Xiangmei Li<sup>1</sup>, Hongtao Lei<sup>1\*</sup>, Juewen Liu<sup>2\*</sup>

1. Guangdong Provincial Key Laboratory of Food Quality and Safety, College of Food Science, South China Agricultural University, Guangzhou 510642, China;

2. Department of Chemistry, Waterloo Institute for Nanotechnology, University of Waterloo, Waterloo, Ontario N2L 3G1, Canada.

\*Corresponding Authors

Hongtao Lei. Email: hongtao@scau.edu.cn

Juewen Liu. Email: liujw@uwaterloo.ca

## Materials and Methods

All of the DNA samples utilized in this study were synthesized by Integrated DNA Technologies (Coralville, IA, USA), with their sequences detailed in Table S1. Streptavidin-coated agarose resin possessed a loading capacity of 1-3 mg biotinylated BSA per milliliter was purchased from Thermo Scientific (IL, USA). 6% BCL agarose bead standard (50-150  $\mu\text{M}$ ) was purchased Agarose Bead Technologies (Spain). The dNTP mix, Taq DNA polymerase with ThermoPol buffer, and a low-molecular-weight DNA ladder were obtained from New England Biolabs (Ipswich, MA). Micro Biospin chromatography columns and SsoFast EvaGreen supermix were procured from Bio-Rad Laboratories (Hercules, CA, American). Copper chloride dihydrate, calcium chloride hexahydrate, scandium chloride hydrate, chromium chloride hexahydrate, manganese chloride hydrate, iron(II) chloride tetrahydrate, iron(III) chloride hexahydrate, cobalt chloride hexahydrate, nickel chloride hexahydrate, cadmium chloride hydrate, barium chloride dihydrate, terbium chloride hexahydrate, mercury acetate, lead bromide, ascorbic acid (AA), thioflavin T (ThT), Amicon ultra-0.5 centrifugal filter unit (with 3K and 10K molecular weight cutoffs) were acquired from Millipore-Sigma (Oakville, ON, Canada). MES sodium salt,  $\text{MgCl}_2 \cdot 6\text{H}_2\text{O}$ , NaCl, HCl and NaOH were obtained from Bio Basic (Toronto, ON, Canada).

Milli-Q water was used in the preparation of all buffers and solutions. The SELEX buffer contained MES (10 mM, pH 6.0) with 2 mM  $\text{MgCl}_2$  and 100 mM NaCl. The separation buffer was MES (10 mM, pH 6.0) with 100 mM NaCl.

## SELEX

The selection process followed our previously established protocol.<sup>1-3</sup>  $\text{CuCl}_2 \cdot 2\text{H}_2\text{O}$  was dissolved in Milli-Q water to a final concentration of 100 mM and subsequently diluted with SELEX buffer for the selection process. A total of 12 rounds of selection were performed, with  $\text{Cu}^{2+}$  concentrations of 10  $\mu\text{M}$  for rounds 1-7 and 2  $\mu\text{M}$  for rounds 8-12. The PCR products from the final round were sequenced. Detailed procedures were as followed.

A 73-nt DNA library containing a 30-nt random region was utilized. In the first round, 500 pmol of DNA library was combined with 1500 pmol of column-binding strand in 250  $\mu\text{L}$  of selection buffer, followed by annealing at 95°C for 3 min, and cool to room temperature for 30 min. A microchromatography column was prepared by packing 100  $\mu\text{L}$  of 6% BCL agarose beads and 100  $\mu\text{L}$  of streptavidin agarose resin, which were pre-washed with 500  $\mu\text{L}$  of SELEX buffer to remove any preservatives. The DNA library/column-binding strand complex mixture was then passed through the column six times to ensure proper binding with the agarose resin. The column was washed 12 times with 500  $\mu\text{L}$  SELEX buffer. After which 750  $\mu\text{L}$  of  $\text{Cu}^{2+}$  solution in selection buffer was passed through the column, and the eluent was collected. The collected target eluents were concentrated using Amico Ultra centrifugal filters (3K MWCO) and washed with 3 times of 500  $\mu\text{L}$  Milli-Q  $\text{H}_2\text{O}$ . Then the DNA was collected, and the final volume was adjusted to 60  $\mu\text{L}$ . This solution was diluted 10-fold and used for PCR amplification with an unlabeled forward primer and a biotinylated reverse primer. The PCR amplicons were captured using 100  $\mu\text{L}$  streptavidin agarose resin. A microchromatography column was prepared by packing 100  $\mu\text{L}$  of 6% BCL agarose beads, after which the PCR amplicons/streptavidin agarose resin mixture was added to the column. Then, the resin was washed with 500  $\mu\text{L}$  of separation buffer for 8 times followed by incubation with 400  $\mu\text{L}$  of 0.2 M NaOH for 15 min. The eluted library strand was collected. An additional 200  $\mu\text{L}$  of 0.2 M NaOH was added to the column, and eluent was combined. The eluent was neutralized with 400  $\mu\text{L}$  0.2 M HCl and concentrated and washed using a 3K centrifugal filter with 460  $\mu\text{L}$  of Milli-Q water and one aliquot of 460  $\mu\text{L}$  SELEX buffer. For the subsequent rounds, the amount of DNA was adjusted to 100 pmol, while all other steps remained the same as the first round.

The last round library was subjected to a PCR with a combination of N501 and N703 sequencing primers (Table S1). These primers contained a unique index sequence to be used for Illumina sequencing. The PCR products were concentrated and washed using a centrifugal filter (10K MWCO) with 500  $\mu\text{L}$  separation buffer, followed by extraction with a small DNA fragment extraction kit (IBI Scientific). The concentration of the eluted DNA was determined using NanoDrop, and sequencing was carried out at the McMaster University Genome Facility. The results were analyzed with Geneious Prime software (Auckland, New Zealand).

### **ThT-based assay**

The fluorescence spectra of ThT-based assay were measured using a Varian Eclipse fluorescence spectrophotometer (CA, American). The assay contained 0.5  $\mu\text{M}$  aptamer and 1  $\mu\text{M}$  ThT dissolved in 500  $\mu\text{L}$  selection buffer. The aptamer/ThT mixture was transferred to a quartz cuvette, where  $\text{Cu}^{2+}$  was gradually titrated to reach a final concentration of 2000 nM. Excitation at 440 nm was applied, with emission recorded between 460 nm and 520 nm. Fluorescence at 490 nm served as the basis for calculations. The initial fluorescence of the aptamer/ThT mixture is denoted as  $F_0$ , and the value after  $\text{Cu}^{2+}$  addition is  $F$ . The ratio  $F/F_0$  was plotted, and the  $K_d$  was determined using the equation:  $y = y_0 + aK_d / (K_d + [\text{Cu}^{2+}])$ , where  $a$  represents the maximal fluorescence signal change at saturation.

### **Fluorescence aptasensor based on strand displacement**

The fluorescence aptasensor experiments were conducted in a 96-well microplate using a Tecan Spark F200 microplate reader (Switzerland). The excitation and emission wavelengths were set to 485 nm and 525 nm, respectively. A mixture of 1  $\mu\text{L}$  of FAM-labeled aptamer Cu-1 (FAM Cu-1, 100  $\mu\text{M}$ ), 2  $\mu\text{L}$  of Quencher-cDNA (100  $\mu\text{M}$ ), and 97  $\mu\text{L}$  of SELEX buffer was annealed at 85°C for 1 min, cooled to room temperature for 30 min, followed by cooling at 4°C for 30 min and then at -20°C for 30 min. For the aptasensor, 2  $\mu\text{L}$  of annealed aptamer was added to 98  $\mu\text{L}$  SELEX buffer, and the background fluorescence of the sensor was monitored for 5 min. Then, 2  $\mu\text{L}$  of series of  $\text{Cu}^{2+}$  solutions were added, and the fluorescence was monitored for an additional 10 min. The data were represented as  $(F-F_0)/F_0$ , where  $F_0$  denotes the fluorescence prior to  $\text{Cu}^{2+}$  addition, and  $F$  is the fluorescence after adding  $\text{Cu}^{2+}$ .

### **Detection of $\text{Cu}^{2+}$ in real samples**

The tap water from our lab was used to validate the reliability of the aptasensor. Initially, the  $\text{Cu}^{2+}$  concentration was determined using ICP-MS performed by ALS Canada Ltd. (3.23 mg/mL). To bring the concentration within the detectable range, the tap water was first diluted 20-fold using Mill-Q water. The sample was then prepared by adding 2  $\mu\text{L}$  of the diluted tap water sample to the 20 nM FAM Cu-1 sensor following the same procedure as for the standard  $\text{Cu}^{2+}$  solution. The concentration was calculated using the standard curve, and the final concentration obtained using the aptasensor was compared to that obtained using ICP-MS.

**Table S1.** The DNA sequences used in this study. The modifications are based on the format of Integrated DNA Technologies Inc.

| DNA name                 | Sequences and modifications (5' to 3')                                                              |
|--------------------------|-----------------------------------------------------------------------------------------------------|
| Library                  | GGAGGCTCTCGGGACGACN <sub>30</sub> GTCGTCCCGATGCTGCAATCGTA<br>A                                      |
| Biotin-column            | GTCGTCCCGAGAGCCATA/ <b>3BioTEG</b> /                                                                |
| Forward primer           | GGAGGCTCTCGGGACGAC                                                                                  |
| Reverse primer           | TTACGATTGCAGCATCGGGACG                                                                              |
| Biotin-reverse primer    | / <b>5Biosg</b> /TTACGATTGCAGCATCGGGACG                                                             |
| P5-501                   | AATGATACGGCGACCACCGAGATCTACACTAGATCGCACACTC<br>TTCCCTACACGACGCTCTTCCGATCTTTACGATTGCAGCATCG<br>GGACG |
| P7-703                   | CAAGCAGAAGACGGCATAACGAGATTTCTGCCTGTGACTGGAGT<br>TCAGACGTGTGCTCTTCCGATCTGGAGGCTCTCGGGACGAC           |
| FAM Cu-1                 | / <b>56-FAM</b> /CTCTCGACGACCACGGTAAACGACGCTGTACGGAGTG<br>GTCTGTGTC                                 |
| Quencher-cDNA            | AGTCGTCGAGAG/ <b>3IABkFQ</b> /                                                                      |
| Cu-1a                    | GACGACCACGTGAAACGACGCTGTACGGAGTGTGCTGTCGTC                                                          |
| Zn <sup>2+</sup> Aptamer | GACGACGCTCCCATTCAGCTTCGGTGGTAGCAGAAGTCGTC                                                           |
| MNZ-1                    | GACGACGGGTTTTGTGCTCAAAAGTTCTGGTGGTAAGTCGTC                                                          |
| SSA-CuII                 | ATCGCGATATTTTCTGTAGCGATTCTTGTGTTGAGCGCTCGGTAC<br>GAACAGA                                            |

## Family 1

|       |               |          |                        |               |           |
|-------|---------------|----------|------------------------|---------------|-----------|
| Cu-01 | <u>GACGAC</u> | CACGGTAA | ACGACGCTGTACGGAGTGGTCT | <u>GTCGTC</u> | 114 Reads |
| Cu-02 | <u>GACGAC</u> | CACGGTAA | AGGTGATGATGGATCACC     | <u>GTCGTC</u> | 93 Reads  |
| Cu-03 | <u>GACGAC</u> | CACGGTAA | AGGACGTATGGAGTCCT      | <u>GTCGTC</u> | 65 Reads  |
| Cu-04 | <u>GACGAC</u> | CACGGTAA | GGTCATGTGAAGTGACC      | <u>GTCGTC</u> | 60 Reads  |
| Cu-05 | <u>GACGAC</u> | CACGGTAA | GAAGGTCAGGGACATTC      | <u>GTCGTC</u> | 54 Reads  |
| Cu-06 | <u>GACGAC</u> | CACGGTAA | CCGGATCGAAGATACGG      | <u>GTCGTC</u> | 49 Reads  |
| Cu-08 | <u>GACGAC</u> | CACGGTAA | GACGAGAGTTACGAGGC      | <u>GTCGTC</u> | 39 Reads  |
| Cu-09 | <u>GACGAC</u> | CACGGTAA | GCCTTGTGTCAAAGGC       | <u>GTCGTC</u> | 38 Reads  |
| Cu-12 | <u>GACGAC</u> | CACGGTAA | GNWTGTNNTAACTNNAANC    | <u>GTCGTC</u> | 36 Reads  |
| Cu-13 | <u>GACGAC</u> | CACGGTAA | AGGTNTGTGCATNAAACCT    | <u>GTCGTC</u> | 36 Reads  |
| Cu-15 | <u>GACGAC</u> | CACGGTAA | GTGAKRCWRTGSSWRAC      | <u>GTCGTC</u> | 35 Reads  |
| Cu-16 | <u>GACGAC</u> | CACGGTAA | GCTGTACATTGTAGAGC      | <u>GTCGTC</u> | 35 Reads  |
| Cu-17 | <u>GACGAC</u> | CACGGTAA | GAGAGGCAACGCCAATC      | <u>GTCGTC</u> | 35 Reads  |
| Cu-20 | <u>GACGAC</u> | CACGGTAA | GTAATCGGATGGATTAC      | <u>GTCGTC</u> | 34 Reads  |
| Cu-21 | <u>GACGAC</u> | CACGGTAA | AYGAGCGTAANCGACT       | <u>GTCGTC</u> | 32 Reads  |
| Cu-22 | <u>GACGAC</u> | CACGGTAA | TGCCGACTAAGTTGGCA      | <u>GTCGTC</u> | 31 Reads  |
| Cu-24 | <u>GACGAC</u> | CACGGTAA | GCTGTAGGTACTATAGC      | <u>GTCGTC</u> | 30 Reads  |
| Cu-25 | <u>GACGAC</u> | CACGGTAA | GTGTGCGCTCTACACAC      | <u>GTCGTC</u> | 30 Reads  |
| Cu-27 | <u>GACGAC</u> | CACGGTAA | ACGAAGAGTATTTCGAGT     | <u>GTCGTC</u> | 29 Reads  |
| Cu-28 | <u>GACGAC</u> | CACGGTAA | GGTCCGATACTAGGACC      | <u>GTCGTC</u> | 29 Reads  |
| Cu-29 | <u>GACGAC</u> | CACGGTAA | GCCATCGTAAGAATGGC      | <u>GTCGTC</u> | 29 Reads  |

## Family 2

|       |               |                                |                           |               |          |
|-------|---------------|--------------------------------|---------------------------|---------------|----------|
| Cu-07 | <u>GACGAC</u> | CAAGTGTCA                      | ANGNTGCATAGNNTCGTNNNGATGG | <u>GTCGTC</u> | 40 Reads |
| Cu-10 | <u>GACGAC</u> | CAAGTGTCA                      | ANGANWNGCNNTATATGATGG     | <u>GTCGTC</u> | 36 Reads |
| Cu-11 | <u>GACGAC</u> | CAAGTGTCA                      | CWNNNGTGCNAGWWNGTNGATGG   | <u>GTCGTC</u> | 36 Reads |
| Cu-23 | <u>GACGAC</u> | GGGCAAGTGTCA                   | ACAGNATGTGGATAGACA        | <u>GTCGTC</u> | 30 Reads |
| Cu-26 | <u>GACGAC</u> | CAAGTGTCA                      | TAAGKCNTGKNNTSNNTGATGG    | <u>GTCGTC</u> | 29 Reads |
| Cu-30 | <u>GACGAC</u> | CAAGTKGGTATANAGTNTATGNNATGGTAT |                           | <u>GTCGTC</u> | 28 Reads |

## Ungrouped

|       |               |                                |               |          |
|-------|---------------|--------------------------------|---------------|----------|
| Cu-14 | <u>GACGAC</u> | GYAGATGCAAGTGTCTCYGATAGMTTCGGA | <u>GTCGTC</u> | 35 Reads |
| Cu-18 | <u>GACGAC</u> | CGGAAGTGTCGTAATTGGATTACGAAGAG  | <u>GGCGTC</u> | 34 Reads |
| Cu-19 | <u>GACGAC</u> | GGCATGGAAAGTGACTTTGTATTAGATGCA | <u>GTCGTC</u> | 34 Reads |

**Figure S1.** Alignment of the top 30 sequences of the Cu<sup>2+</sup> selection library. Two families were identified. The nucleotides in the primer-binding regions are in black and underlined, the conserved nucleotides are marked in red. This is consistent with that presented in the main paper, where the top 10 sequences were aligned.

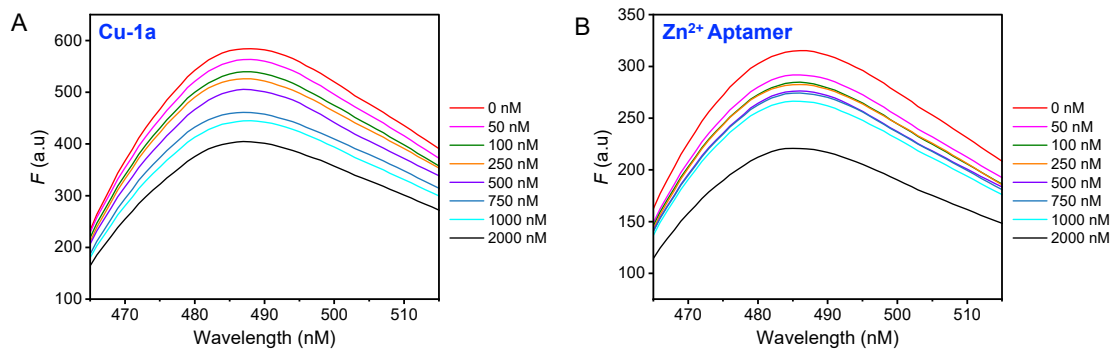

**Figure S2.** The fluorescence spectra of (A) ThT/Cu-1a and (B) ThT/Zn<sup>2+</sup> aptamer mixtures in the presence of different concentrations of Cu<sup>2+</sup> (Buffer: 10 mM MES pH 6, 100 mM NaCl, 2 mM MgCl<sub>2</sub>, Cu-1: 0.5 μM, ThT: 1 μM).

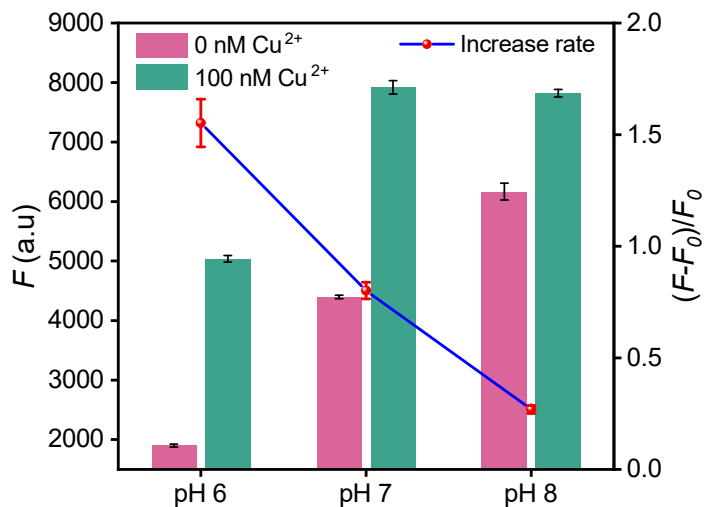

**Figure S3.** Effect of pH on aptamer Cu-1 Binding. pH 6, 10 mM MES (100 mM NaCl, 2 mM MgCl<sub>2</sub>). pH 7, 10 mM HEPES (100 mM NaCl, 2 mM MgCl<sub>2</sub>). pH 8, 10 mM HEPES (100 mM NaCl, 2 mM MgCl<sub>2</sub>). The best performance was achieved at pH 6.

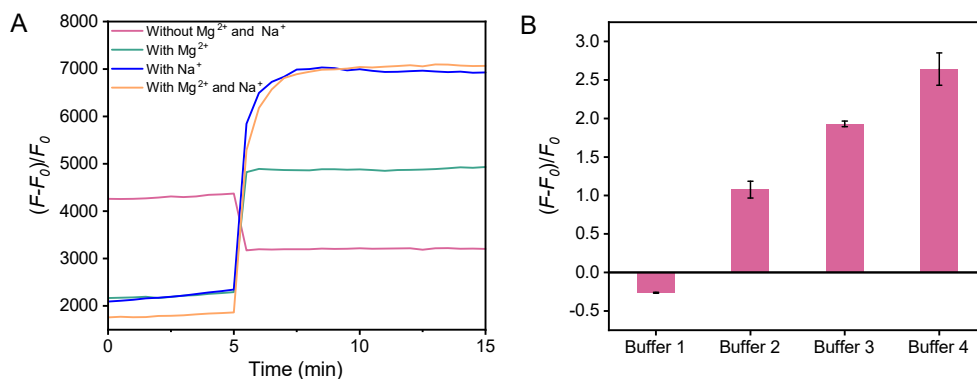

**Figure S4.** (A) Kinetics traces of the FAM-based sensor at a  $\text{Cu}^{2+}$  concentration of 500 nM in the presence of different binding buffer: 10 mM MES (pH 6.0, Buffer 1), 10 mM MES with 2 mM  $\text{Mg}^{2+}$  (pH 6.0, Buffer 2), 10 mM MES with 100 mM  $\text{Na}^+$  (pH 6.0, Buffer 3), and 10 mM MES with 2 mM  $\text{Mg}^{2+}$  and 100 mM  $\text{Na}^+$  (pH 6.0, Buffer 4). (B) Fluorescence enhancement of the sensor under the four different buffers. Buffer 4 has the best sensor response and was chosen for sensing studies.

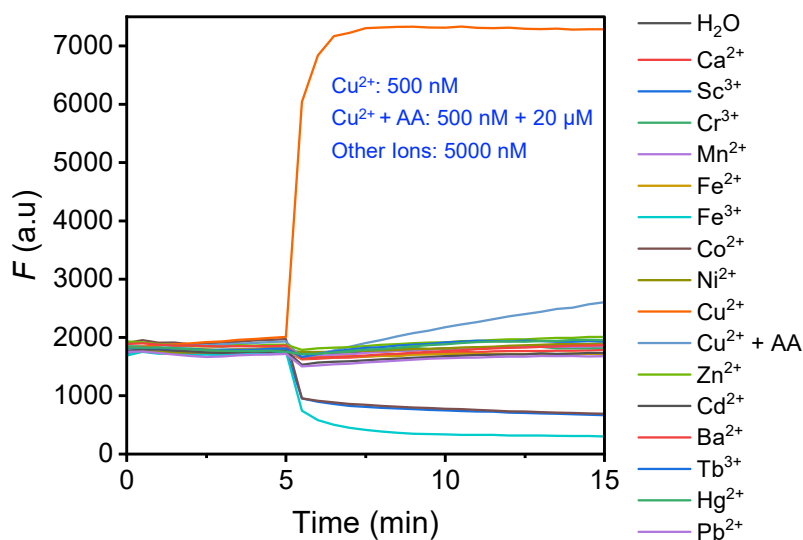

**Figure S5.** Kinetics traces of 20 nM FAM and 40 nM Quencher-cDNA Cu-1 sensor in the presence of different metal ions in Buffer 4 (10 mM MES pH 7.4, 100 mM NaCl, 2 mM  $\text{MgCl}_2$ )

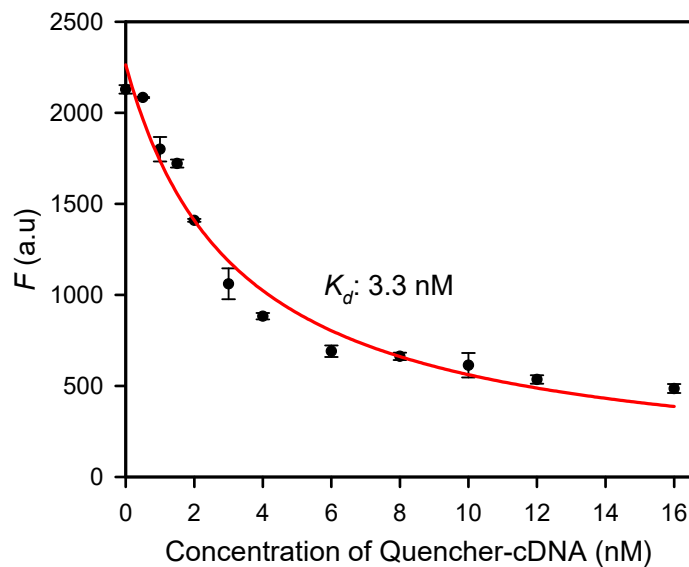

**Figure S6.** Fluorescence quenching of 5 nM of FAM Cu-1 by increasing concentration of Quencher-cDNA in Buffer 4 (10 mM MES pH 6, 100 mM NaCl, 2 mM  $\text{MgCl}_2$ ). From this experiment, the  $K_d$  value of the Quencher-cDNA and FAM-labeled Cu-1 aptamer can be calculated.

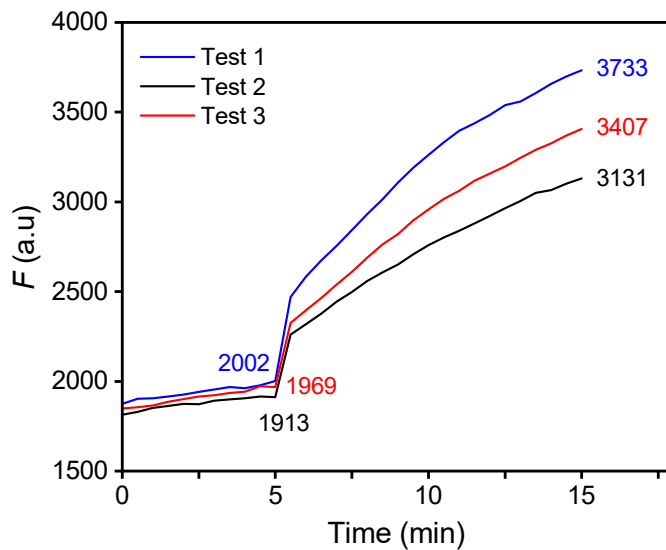

**Figure S7.** Kinetic response of FAM Cu-1 sensor to 20 times dilution of tap water. The data points at 15 min of this graph were used for calculation.



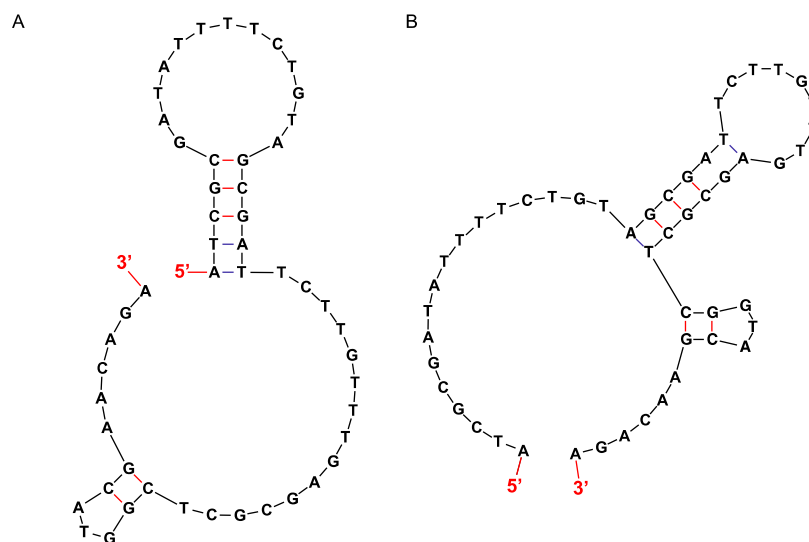

**Figure S8.** The predicted secondary structures of the SSA-CuII aptamer by mfold. These two structures (A and B) were from the same sequence. Compared to these two aptamers, the newly selected Cu-I aptamer is shorter and has a better defined secondary structure allowing rational sequence modification for sensing applications.

### References

1. X. Li, Z. Yang, M. Waniss, X. Liu, X. Wang, Z. Xu, H. Lei and J. Liu, *Anal. Chem.*, 2023, **95**, 16366-16373.
2. L. Gu, Y. Ding, Y. Zhou, Y. Zhang, D. Wang and J. Liu, *Angew. Chem., Int. Ed.*, 2024, **63**, e202314450.
3. Y. Ding and J. Liu, *J. Am. Chem. Soc.*, 2023, **145**, 7540-7547.
